# Supplementary material
Source: PubMed Central journal article supplement (PMC7876620)
Supplement: jamacardiol-e207472-s001.pdf [file jamacardiol-e207472-s001.pdf]

## Supplemental Online Content

Agarwal MA, Fonarow GC, Ziaeeian B. National trends in heart failure hospitalizations and readmissions from 2010 to 2017. *JAMA Cardiol*. Published online February 10, 2021. doi:10.1001/jamacardio.2020.7472

**eTable 1.** Trends of patient demographics and comorbidities from 2010 to 2017 for unique patients with single primary heart failure hospitalizations

**eTable 2.** Trends of patient demographics and comorbidities from 2010 to 2017 for unique patients with multiple primary heart failure hospitalizations

This supplementary material has been provided by the authors to give readers additional information about their work.

**eTable 1.** Trends of patient demographics and comorbidities from 2010 to 2017 for unique patients with single primary heart failure hospitalizations

|                                                     | <b>2010<br/>(n= 1,017,475)</b> | <b>2011<br/>(n= 985, 034)</b> | <b>2012<br/>(n= 957, 509)</b> | <b>2013<br/>(n= 962,819)</b> | <b>2014<br/>(n= 994,099)</b> | <b>2015<br/>(n=1,057,652)</b> | <b>2016<br/>(n=1,090,348)</b> | <b>2017<br/>(n=1,208,334)</b> |
|-----------------------------------------------------|--------------------------------|-------------------------------|-------------------------------|------------------------------|------------------------------|-------------------------------|-------------------------------|-------------------------------|
| <b>Age, Mean (SD), in years</b>                     | 73.0 (13.2)                    | 73.0 (13.2)                   | 72.9 (13.1)                   | 72.9 (13.2)                  | 72.8 (14.0)                  | 72.6 (15.0)                   | 72.4 (15.0)                   | 72.3 (15.2)                   |
| <b>Female, % (95% CI)</b>                           | 50.9 (50.5 to 51.4)            | 50.5 (50.0 to 50.9)           | 50.0 (49.5 to 50.4)           | 49.4 (49.1 to 49.7)          | 49.1 (48.8 to 49.4)          | 48.9 (48.6 to 49.2)           | 48.8 (48.5 to 49.1)           | 48.5 (48.3 to 48.8)           |
| <b>Payer status, % (95% CI)</b>                     |                                |                               |                               |                              |                              |                               |                               |                               |
| <i>Medicare</i>                                     | 76.2 (75.3 to 77.1)            | 76.3 (75.4 to 77.2)           | 76.7 (75.7 to 77.6)           | 76.5 (75.8 to 77.2)          | 76.3 (75.6 to 77.1)          | 76.1 (75.4 to 76.8)           | 75.9(75.2 to 76.6)            | 76.2 (75.6 to 76.7)           |
| <i>Medicaid</i>                                     | 7.1 (6.6 to 7.6)               | 7.2 (6.7 to 7.7)              | 7.1 (6.6 to 7.6)              | 7.1 (6.7 to 7.5)             | 8.2 (7.8 to 8.6)             | 8.4 (8.1 to 8.8)              | 8.9 (8.4 to 9.3)              | 8.9 (8.5 to 9.3)              |
| <i>Private</i>                                      | 11.5 (11.0 to 12.0)            | 11.1 (10.6 to 11.6)           | 10.7 (10.2 to 11.2)           | 10.5 (10.1 to 10.9)          | 10.5 (10.1 to 10.9)          | 10.8 (10.4 to 11.2)           | 10.5 (10.2 to 10.9)           | 10.4 (10.1 to 10.7)           |
| <i>Self-pay</i>                                     | 3.0 (2.7 to 3.2)               | 2.9 (2.7 to 3.1)              | 3.0 (2.8 to 3.3)              | 3.2 (3.0 to 3.5)             | 2.7 (2.5 to 3.0)             | 2.5 (2.2 to 2.7)              | 2.4 (.2 to 2.6)               | 2.2 (2.1 to 2.4)              |
| <i>No-charge</i>                                    | 0.2(0.2 to 0.4)                | 0.3 (0.2 to 0.4)              | 0.3 (0.2 to 0.4)              | 0.4(0.3 to 0.5)              | 0.4 (0.3 to 0.5)             | 0.3(0.2 to 0.4)               | 0.3(0.2 to 0.4)               | 0.3 (0.2 to 0.3)              |
| <i>Other</i>                                        | 2.0 (1.8 to 2.2)               | 2.2 (2.0 to 2.5)              | 2.2 (2.1 to 2.6)              | 2.3 (2.0 to 2.5)             | 1.9 (1.6 to 2.1)             | 1.9 (1.7 to 2.1)              | 2.0 (1.7 to 2.3)              | 2.0 (1.8 to 2.1)              |
| <b>Median Household Income quartile, % (95% CI)</b> |                                |                               |                               |                              |                              |                               |                               |                               |
| <i>1<sup>st</sup></i>                               | 35.1 (33.3 to 37.0)            | 35.7(33.9 to 37.7)            | 35.5(33.7 to 37.4)            | 31.7 (30.1 to 33.3)          | 31.3(29.7 to 32.9)           | 33.6(32.0 to 35.2)            | 33.3 (31.7 to 34.9)           | 33.7 (32.3to 35.1)            |
| <i>2<sup>nd</sup></i>                               | 25.0 (23.8 to 26.1)            | 24.1 (23.0 to 25.2)           | 24.5 (23.4 to 25.6)           | 27.5(26.4 to 28.6)           | 27.6 (26.5 to 28.7)          | 25.5(24.5 to 26.4)            | 26.4 (25.3 to 27.4)           | 28.1 (27.2 to 29.1)           |
| <i>3<sup>rd</sup></i>                               | 21.6 (20.5 to 22.7)            | 22.7 (21.6 to 23.9)           | 21.8(20.7 to 22.8)            | 22.8(21.9 to 23.7)           | 22.1 (21.2 to 23.2)          | 23.4(22.4 to 24.5)            | 23.6(22.6 to 24.6)            | 22.4(21.5 to 23.4)            |
| <i>4<sup>th</sup></i>                               | 18.3(16.9 to 19.8)             | 17.5(16.0 to 18.9)            | 18.2(16.8 to 19.8)            | 18.0 (16.7 to 19.5)          | 19.0 (17.6 to 20.5)          | 17.5(16.2 to 18.9)            | 16.7 (15.5 to 18.1)           | 15.8 (14.7 to 16.9)           |
| <b>Comorbidities, % (95% CI)</b>                    |                                |                               |                               |                              |                              |                               |                               |                               |
| <i>Hypertension</i>                                 | 76.5 (76.0 to 77.1)            | 77.5 (77.0 to 78.1)           | 78.6 (77.9 to 79.3)           | 79.5(79.0 to 80.1)           | 81.2 (80.6 to 81.7)          | 83.2 (82.7 to 83.6)           | 86.3 (85.8 to 86.7)           | 91.0 (90.7 to 91.2)           |
| <i>Diabetes</i>                                     | 43.9 (43.4 to 44.3)            | 44.2(43.7 to 44.7)            | 44.4 (43.9 to 45.0)           | 45.2(44.7 to 45.6)           | 46.1 (45.7 to 46.5)          | 46.5 (46.1 to 46.8)           | 45.6 (45.2 to 46.1)           | 47.3 (46.9 to 47.7)           |
| <i>Lipid disorders</i>                              | 40.4 (39.5 to 41.3)            | 42.1 (41.2 to 43.0)           | 43.7 (42.8 to 44.7)           | 46.2 (45.4 to 47.0)          | 48.2 (47.4 to 49.0)          | 50.2(49.5 to 50.9)            | 51.7 (50.8 to 52.5)           | 53.2 (52.4 to 53.9)           |
| <i>CAD</i>                                          | 53.0 (52.3 to 53.8)            | 52.5 (51.8 to 53.2)           | 52.8(52.1 to 53.6)            | 52.9 (52.3 to 53.6)          | 52.8 (52.1 to 53.4)          | 53.0(52.5 to 53.6)            | 52.9 (52.4 to 53.4)           | 53.0 (52.4 to 53.5)           |
| <i>COPD</i>                                         | 28.6 (28.1 to 29.1)            | 28.8 (28.3 to 29.3)           | 29.1 (28.5 to 29.6)           | 29.2 (28.7 to 29.7)          | 29.1 (28.7 to 29.6)          | 29.9(29.5 to 30.3)            | 33.1 (32.6 to 33.5)           | 33.7 (33.3 to 34.2)           |
| <i>Renal disease</i>                                | 43.1 (42.4 to 43.8)            | 44.6(44.0 to 45.3)            | 46.2(45.5 to 46.9)            | 49.8(49.3 to 50.4)           | 51.7(51.1 to 52.3)           | 52.9(52.4 to 53.5)            | 54.8(54.3 to 55.3)            | 57.6 (57.2 to 58.0)           |

**eTable 2.** Trends of patient demographics and comorbidities from 2010 to 2017 for unique patients with multiple primary heart failure hospitalizations

|                                                     | <b>2010<br/>(n= 1,017,475)</b> | <b>2011<br/>(n= 985, 034)</b> | <b>2012<br/>(n= 957, 509)</b> | <b>2013<br/>(n= 962,819)</b> | <b>2014<br/>(n= 994,099)</b> | <b>2015<br/>(n=1,057,652)</b> | <b>2016<br/>(n=1,090,348)</b> | <b>2017<br/>(n=1,208,334)</b> |
|-----------------------------------------------------|--------------------------------|-------------------------------|-------------------------------|------------------------------|------------------------------|-------------------------------|-------------------------------|-------------------------------|
| <b>Age, Mean (SD), in years</b>                     | 71.0 (14.0)                    | 70.9 (14.0)                   | 70.7 (13.8)                   | 70.4 (14.4)                  | 70.3 (14.7)                  | 70.0 (15.6)                   | 69.6 (15.7)                   | 69.6 (15.8)                   |
| <b>Female, % (95% CI)</b>                           | 48.1 (47.2 to 48.9)            | 48.1 (47.3 to 48.9)           | 47.4(46.6 to 48.2)            | 46.6 (46.0 to 47.2)          | 46.6 (46.1 to 47.2)          | 46.2 (45.7 to 46.7)           | 46.4 (45.9 to 46.9)           | 45.7 (45.3 to 46.2)           |
| <b>Payer status, % (95% CI)</b>                     |                                |                               |                               |                              |                              |                               |                               |                               |
| <i>Medicare</i>                                     | 74.9 (73.7 to 76.0)            | 75.5 (74.5 to 76.7)           | 75.3 (74.0 to 76.5)           | 74.7 (73.4 to 75.5)          | 73.3 (72.5 to 74.6)          | 73.5 (72.6 to 74.6)           | 73.0 (72.0 to 73.9)           | 73.5 (73.0 to 74.6)           |
| <i>Medicaid</i>                                     | 11.5 (10.8 to 12.5)            | 11.5 (10.7 to 12.5)           | 11.6 (10.8 to 12.6)           | 12.3 (11.6 to 13.1)          | 13.6 (12.9 to 14.5)          | 13.7 (13.2 to 14.7)           | 14.8(14.2 to 15.7)            | 14.5 (13.8 to 15.2)           |
| <i>Private</i>                                      | 9.0 (8.5 to 9.6)               | 8.5 (8.1 to 9.2)              | 8.6 (7.9 to 9.3)              | 8.1 (7.5 to 8.6)             | 8.5 (8.0 to 9.1)             | 8.4(7.9 to 8.9)               | 8.0 (7.6 to 8.5)              | 7.8(7.4 to 8.2)               |
| <i>Self-pay</i>                                     | 2.2 (2.0 to 2.6)               | 2.1 (1.9 to 2.4)              | 2.1 (1.8 to 2.4)              | 2.5 (2.3 to 2.8)             | 2.1 (1.8 to 2.4)             | 1.9 (1.6 to 2.3)              | 1.8 (1.6 to 2.1)              | 1.8 (1.7 to 2.1)              |
| <i>No-charge</i>                                    | 0.2 (0.2 to 0.4)               | 0.2 (0.1 to 0.3)              | 0.2 (0.1 to 0.2)              | 0.2 (0.2 to 0.3)             | 0.3 (0.2 to 0.5)             | 0.3 (0.2 to 0.4)              | 0.2(0.2 to 0.3)               | 0.2 (0.2 to 0.3)              |
| <i>Other</i>                                        | 0.2 (0.2 to 0.2)               | 0.2 (0.2 to 0.2)              | 0.2 (0.2 to 0.3)              | 0.2(0.2 to 0.3)              | 0.2 (0.2 to 0.2)             | 0.2 (0.2 to 0.2)              | 0.2(0.2 to 0.2)               | 0.2 (0.2 to 0.2)              |
| <b>Median Household Income quartile, % (95% CI)</b> |                                |                               |                               |                              |                              |                               |                               |                               |
| <i>1<sup>st</sup></i>                               | 38.8 (36.4 to 41.2)            | 39.7 (37.4 to 42.1)           | 39.9 (37.7 to 42.3)           | 37.1 (35.2 to 38.9)          | 36.6 (34.6 to 38.6)          | 39.4 (37.6 to 41.3)           | 38.8 (37.0 to 40.6)           | 38.9 (37.2 to 40.6)           |
| <i>2<sup>nd</sup></i>                               | 23.9 (22.7 to 25.1)            | 23.5 (22.2 to 24.8)           | 23.7 (22.5 to 25.0)           | 26.0 (24.9 to 27.2)          | 26.6 (25.4 to 27.8)          | 24.2 (23.2 to 25.3)           | 25.4 (24.3 to 26.5)           | 26.9 (25.9 to 27.9)           |
| <i>3<sup>rd</sup></i>                               | 20.8 (19.5 to 22.1)            | 21.5(20.3 to 22.7)            | 20.2 (19.0 to 21.4)           | 21.1 (20.2 to 22.2)          | 20.0 (19.1 to 21.2)          | 21.1 (20.0 to 22.1)           | 21.3 (20.4 to 22.4)           | 20.2 (19.3 to 21.3)           |
| <i>4<sup>th</sup></i>                               | 16.5 (15.1 to 18.1)            | 15.3 (13.9 to 16.9)           | 16.2 (14.6 to 17.7)           | 15.8 (14.4 to 17.2)          | 16.8 (15.3 to 18.3)          | 15.3 (14.0 to 16.7)           | 14.5 (13.2 to 15.8)           | 14.0 (12.9 to 15.1)           |
| <b>Comorbidities, % (95% CI)</b>                    |                                |                               |                               |                              |                              |                               |                               |                               |
| <i>Hypertension</i>                                 | 76.5 (75.7 to 77.2)            | 77.4 (76.7 to 78.1)           | 78.9 (78.1 to 79.6)           | 79.9 (79.1 to 80.7)          | 81.9 (81.2 to 82.6)          | 84.0 (83.4 to 84..6)          | 87.6(87.1 to 88.1)            | 92.8(92.4 to 93.2)            |
| <i>Diabetes</i>                                     | 48.4 (47.7 to 49.0)            | 48.7 (47.9 to 49.4)           | 49.0 (48.3 to 49.8)           | 50.2 (49.6 to 50.7)          | 51.2 (50.5 to 51.9)          | 51.4 (50.8 to 52.0)           | 52.0 (51.3 to 52.7)           | 53.8 (53.3 to 54.4)           |
| <i>Lipid disorders</i>                              | 39.8 (38.6 to 40.9)            | 41.9 (40.8 to 43.0)           | 43.6(42.5 to 44.7)            | 45.8 (44.8 to 46.7)          | 48.2 (47.2 to 49.2)          | 50.1 (49.1 to 51.0)           | 51.4 (50.3 to 52.4)           | 53.0 (52.1 to 54.0)           |
| <i>CAD</i>                                          | 58.2 (57.3 to 59.1)            | 57.5 (56.6 to 58.5)           | 58.0 (57.0 to 59.0)           | 57.9 (57.0 to 58.8)          | 58.3 (57.4 to 59.1)          | 58.4 (57.6 to 59.2)           | 57.8 (57.1 to 58.6)           | 57.9 (57.2 to 58.6)           |
| <i>COPD</i>                                         | 33.3 (32.6 to 34.1)            | 33.5 (32.6 to 34.1)           | 34.3 (33.5 to 35.1)           | 34.0(33.3 to 34.7)           | 34.0 (33.2 to 34.7)          | 36.1 (35.4 to 36.8)           | 40.2 (39.5 to 40.8)           | 41.0 (40.3 to 41.7)           |
| <i>Renal disease</i>                                | 54.9 (53.9 to 55.8)            | 56.2 (55.2 to 57.2)           | 58.0 (57.0 to 58.9)           | 62.0(61.2 to 62.8)           | 63.8 (63.0 to 64.5)          | 65.4 (64.7 to 66.1)           | 67.4 (66.7 to 68.1)           | 70.4 (69.8 to 70.9)           |
